# Supplementary material
Source: PubMed Central journal article supplement (PMC8536334)
Supplement: pnas.2026583118.sapp.pdf [file pnas.2026583118.sapp.pdf]

# SUPPORTING INFORMATION

## Lipid-based and protein-based interactions synergize transmembrane signaling stimulated by antigen-clustering of IgE receptors

Nirmalya Bag\*, Alice Wagenknecht-Wiesner, Allan Lee, Sophia M. Shi, David A. Holowka, Barbara A. Baird\*

### MATERIALS AND METHODS

#### Reagents

Minimum essential medium (MEM), F-12 medium, Opti-MEM, Trypsin-EDTA (0.01%) and gentamicin sulfate were obtained from Life Technologies (Carlsbad, CA). Fetal Bovine Serum (FBS) was purchased from Atlanta Biologicals (Atlanta, GA). Anti-phosphotyrosine antibody clone 4G10 was purchased from Millipore (Billerica, MA). Alexa Fluor 633 (AF633) anti-mouse immunoglobulin G 2b (IgG2b) secondary antibody was purchased from Life Technologies (Carlsbad, CA). Phosphate Buffered Saline (PBS) was obtained from Sigma Aldrich. Gentamicin and Geneticin (G418 sulfate) were purchased from Thermo Fisher Scientific (Waltham, MA). Alexa Fluor 488 (AF488) NHS ester (Invitrogen) was used to fluorescently label monoclonal anti-DNP (2,4-dinitrophenyl) immunoglobulin E (IgE) yielding AF488-IgE as described previously (1). The antigenic multivalent ligand, DNP-BSA, was prepared by conjugating DNP sulfonate (Sigma-Aldrich) to bovine serum albumin (BSA) (2). Phorbol 12,13-dibutyrate (PDB) was obtained from Sigma-Aldrich (St. Louis, MO). Stock solution of PDB was prepared in DMSO and stored at -80°C.

#### Plasmids

The new DNA constructs created during this study are described below.

#### PTP $\alpha$ -EGFP and PTP $\alpha$ -mCherry

The initial PTP $\alpha$ -mEos3.2 was created by PCR using the PTP $\alpha$ -HA plasmid, provided by David Shalloway (Cornell University) and primers (forward sequence) 5'-CGCCGCTAGCGGCCACCATGGATTCC-3' and (reverse sequence) 5'-TGTCCTCGAGCTTGAAGTTGGCATAAT-3'. The fragment was ligated into the mEos3.2-N1 vector using generated 5'-NheI and 3'-XhoI restriction sites.

PTP $\alpha$ -mCherry was generated by exchanging the fluorescence protein in the PTP $\alpha$ -mEos3.2 construct with the mCherry sequence by digestion with 5'-XhoI and 3'-NotI.

PTP $\alpha$ -EGFP was constructed by exchanging the fluorescence protein in the PTP $\alpha$ -mCherry construct with the EGFP sequence by digestion with 5'-XhoI and 3'-NotI.

#### PTP $\alpha$ -E-TM-EGFP

This construct is created by deleting the intracellular part of the PTP $\alpha$ -EGFP construct. The extracellular and transmembrane portions of PTP $\alpha$  with 5'-NheI and 3'-XhoI sites was created by PCR with primers (forward sequence) 5'- AAAAAGCTAGCGGCCACCATGGATTCTGG-3' and

42 (reverse sequence) 5'-AAAACTCGAGTCTGGCCAGAAGTGGCACACTCTGG-3'. The fragment  
43 was ligated in to pEGFP-N1 (Clontech Laboratories, Palo Alto, CA).

#### 44 S15-Lyn-EGFP

45 The S15-Lyn-EGFP construct, where the first 15 amino acids of Lyn are replaced by the first  
46 15 amino acids of Src-kinase, was generated in two consecutive cloning steps. In a first step a  
47 truncated version of the wt-Lyn was created by PCR with primers (forward sequence) 5'-  
48 AAAACTGCAGGGAGTAGATATGAAGACTCAACCAGTTCCTGAATC-3' and (reverse sequence)  
49 5'-AAAAGGATCCGCCGGTTGCTGCTG-3' and subcloned into the pEGFP-N1 vector via the 5'-  
50 PstI and 3'-BamHI sites.

51 In a second step the Src-kinase N-terminal portion was inserted into the above generated  
52 plasmid by using 5'-XhoI and 3'-PstI and annealed complementary oligos 5'-  
53 TCGAGATGGGGAGCAGCAAGAGCAAGCCCAAGGACCCAGCCAGCGCCGGCTGCA-3' and 5'-  
54 GCCGGCGCTGGCTGGGGTCCTTGGGCTTGCTCTTGCTGCTCCCCATC-3'.

#### 55 Lyn-K279R-EGFP

56 The Lys to Arg (at position 279 in the kinase domain of Lyn) Lyn mutant (Lyn-K279R-EGFP)  
57 of wt Lyn-EGFP (3) was generated performing site-directed mutagenesis with primers (forward  
58 sequence) 5'-GCACAAAAGTGGCTGTAAGGACCCTCAAGCCTGG-3' and (reverse sequence) 5'-  
59 CCAGGCTTGAGGGTCCTTACAGCCACTTTTGTGC-3'.

#### 60 **RBL cell culture, transfection, sensitization and stimulation**

61 RBL-2H3 mast cells (for brevity, RBL cells) were cultured in growth medium (80% MEM  
62 supplemented with 20% FBS and 10 mg/L gentamicin sulfate) at 37°C and 5% (v/v) CO<sub>2</sub>  
63 environment.

64  
65 *Chemical transfection:* RBL Cells in a confluent 25 cm<sup>2</sup> flask were washed once with 2 mL  
66 Trypsin-EDTA, detached with 2 mL Trypsin-EDTA for 5 min at 37°C and 5% (v/v) CO<sub>2</sub> environment.  
67 The Trypsin-EDTA is quenched with 8 mL of growth medium (~10<sup>6</sup> cells/mL). About 20,000 cells  
68 were homogeneously spread in a 35 mm MatTek dish (Ashland, MA) containing 2 mL growth  
69 medium and allowed to grow overnight. MatTek dishes containing the adherent cells were  
70 transfected using FuGENE HD transfection kit (Promega). For one MatTek dish, plasmid DNA (0.5  
71 – 1 µg) and FuGENE (3 µL FuGENE/µg DNA) were first mixed in 100 µL Opti-MEM medium and  
72 incubated at room temperature for 15 min. Next, MatTek dishes containing cells were washed once  
73 and covered with 1 mL Opti-MEM. The DNA/FuGENE complex was spread evenly over the cells  
74 and incubated for 1 hr, followed by incubation with pre-warmed PDB (1 mL, 0.1 µg/mL) for 3 hr at  
75 37°C in 5% (v/v) CO<sub>2</sub> environment. Finally, 2 mL of growth medium was added to each MatTek dish  
76 after discarding Opti-MEM. The transfected cells were cultured for 18 – 22 hr at 37°C in 5% (v/v)  
77 CO<sub>2</sub> environment before DRM preparation or live cell imaging or FRAP measurements. The  
78 chemically transfected plasmids used in this study encode the following proteins: PM-EGFP (4),  
79 EGFP-GG (4), S15-EGFP (5), YFP-GL-GPI (6), YFP-GL-GT46 (6), Lyn-EGFP (3), Lyn-mSH2-  
80 EGFP (7), Lyn-mSH3-EGFP (7), Lyn-K279R-EGFP (8), and S15-Lyn-EGFP.

81  
82 Lyn-mSH2-EGFP, Lyn-mSH3-EGFP, and Lyn-K279R-EGFP are point mutants of Lyn-EGFP  
83 to disable functions of SH2, SH3, and kinase modules respectively. The mutation sites are: Arg to

84 Ala at position 135 (Lyn-mSH2-EGFP), Try to Ala at position 78 (Lyn-mSH3-EGFP), and Lys to Arg  
85 at position 279 (Lyn-K279R-EGFP).

86

87 PTP $\alpha$ -E-TM-EGFP was transfected using lipofectamine 2000 reagent kit (Thermo Fisher  
88 Scientific (Waltham, MA)) following manufacturer's protocol. For one MatTek dish prepared as  
89 before (for the FuGENE-based transfection), 1  $\mu$ g plasmid and 4  $\mu$ L lipofectamine reagent was  
90 used.

91

92 *Electroporation:* RBL cells in a confluent 75 cm<sup>2</sup> flask were washed and trypsinized for 8 min  
93 at 37°C and 5% (v/v) CO<sub>2</sub> environment with 3 mL Trypsin-EDTA. The detached cells were  
94 resuspended in 7 mL of growth medium and centrifuged to remove the medium. The cell palette  
95 (15 $\times$ 10<sup>6</sup> cells) was resuspended in 1.5 mL of cold electroporation buffer (137 mM NaCl, 2.7 mM  
96 KCl, 1.0 mM MgCl<sub>2</sub>, 1 mg/ml glucose, and 20 mM HEPES; pH 7.4). Next, 10  $\mu$ g of plasmid DNA  
97 was thoroughly mixed with 500  $\mu$ L of the resuspended cells in an electroporation cuvette (Bio-Rad).  
98 This cuvette was subject to an electroporation pulse (280 V, 950  $\mu$ F) using a Gene Pulser X (Bio-  
99 Rad) electroporation module. The electroporated cells were then added to 6 mL of growth medium,  
100 mixed thoroughly, and deposited in MatTek dishes (2 mL/dish). The cells were allowed to attach on  
101 the dish for 3 hr at 37°C and 5% (v/v) CO<sub>2</sub> environment following which the medium was replaced  
102 with fresh growth medium. The cells were cultured for 24 hr to recover before proceeding to the  
103 next sample preparation steps. The electroporated plasmids used in this study encode the following  
104 protein: PTP $\alpha$ -EGFP.

105

106 *Cell sensitization and stimulation:* RBL cells were washed twice with Buffered Salt Solution  
107 (BSS: 135 mM NaCl, 5.0 mM KCl, 1.8 mM CaCl<sub>2</sub>, 1.0 mM MgCl<sub>2</sub>, 5.6 mM glucose, and 20 mM  
108 HEPES; pH 7.4) and sensitized with 2  $\mu$ g/mL of anti-DNP IgE (for transfected cells to monitor  
109 stimulation-induced changes of the transfected probe) or a mixture of 0.5  $\mu$ g/mL AF488-IgE and 1.5  
110  $\mu$ g/mL of anti-DNP IgE (for untransfected cells to test the stimulation-induced changes of Fc $\epsilon$ RI)  
111 prepared in BSS for 40 min at room temperature. The cells were washed twice with BSS and  
112 stimulated with 0.5  $\mu$ g/mL DNP-BSA antigen (Ag) for 15 min at room temperature. Finally, the cells  
113 were washed twice with BSS and imaged in fresh BSS or subjected to detergent resistant  
114 membrane (DRM) preparation.

115

### 116 **Immunostaining of Chinese Hamster Ovary (CHO) cells stably transfected with Fc $\epsilon$ RI (CHO- 117 Fc $\epsilon$ RI) and imaging:**

118 CHO-Fc $\epsilon$ RI cells (9) were maintained in 80% F-12 and 20% FBS medium containing 50  
119 mg/mL Geneticin (G418 sulfate) and 1 mg/mL Gentamycin antibiotics in 37°C and 5% CO<sub>2</sub>  
120 environment. The expression of Fc $\epsilon$ RI in these cells were routinely monitored by labelling them with  
121 AF488-IgE.

122

123 For immunostaining, CHO-Fc $\epsilon$ RI cells were grown to 70-80% confluency in MatTek dishes  
124 (Ashland, MA) and were transfected using Mirus TransIT-2020 (Mirus Bio, Madison, WI) reagent kit  
125 following manufacturer's protocol. Typically, 1  $\mu$ g of Lyn-EGFP or S15-Lyn-EGFP plasmid along  
126 with 2  $\mu$ g PTP $\alpha$ -mCherry plasmid and 6  $\mu$ L of Mirus reagent was used per MatTek dish. The cells  
127 were incubated ~22-24 hours with the plasmid/Mirus mixture in 37°C and 5% CO<sub>2</sub> incubator. The  
128 cells were then washed twice with BSS and sensitized with 2  $\mu$ g/mL IgE in BSS for 40 minutes at

129 room temperature. The excess IgE was washed with BSS, and then the cells were incubated with  
130 either fresh BSS (resting condition) or 0.9 µg/mL DNP-BSA antigen (stimulated condition) for 5  
131 minutes at 37°C (10). Following this, the cells were washed once with BSS and twice with PBS  
132 buffer and fixed with 4% paraformaldehyde and 0.1% glutaraldehyde in PBS for 10 minutes at room  
133 temperature. The fix was quenched with blocking buffer 10 mg/mL bovine serum albumin (BSA) in  
134 PBS. The fixed cells were then permeabilized and labelled with anti-phosphotyrosine antibody  
135 (4G10) solution (5 µg/mL 4G10, 0.1% Triton X-100, and 10 mg/mL BSA in PBS) for 1 hour at room  
136 temperature. The dishes were then washed multiple times with blocking buffer (10 mg/mL BSA in  
137 PBS) followed by incubation with secondary antibody (1 µg/mL Alexa Flour 633 (AF633) anti-mouse  
138 immunoglobulin G 2b (IgG2b) antibody, 0.1% Triton X-100, and 10 mg/ml BSA in PBS) for 1 hour at  
139 room temperature. The dishes were washed multiple times with blocking buffer and stored in PBS  
140 at 4°C until imaging.

141  
142 Fluorescence imaging of the cells was performed using the epi-fluorescence microscope (for  
143 TIRF imaging) described below. We used 641 nm laser (Coherent, Santa Clara, CA) and PLAN,  
144 10×, 0.22 NA objective to excite the sample. The fluorescence images were recorded by an  
145 electron multiplying charge coupled device (EMCCD) camera (black illuminated Andor iXON3 897,  
146 pixel size 16 µm, Andor Technology, Belfast, UK) after being filtered by a ZET405/488/561/640m  
147 emission filter (Chroma technology). Generally, more than 100 cells from 7-10 fields of view (FOVs)  
148 were imaged per dish. Fluorescence of individual cells was determined after background correction  
149 using FIJI (11). Average fluorescence of multiple regions of interest outside cells in a given FOV  
150 was used as background. For each pair of samples (resting (-Ag) and stimulated (+Ag) conditions),  
151 three independent experiments were performed. The fold change of phosphorylation (as quantified  
152 from the fluorescence of the AF633 labelled secondary antibody against 4G10) of stimulated cells  
153 relative to the resting cells were quantified for each biological replica as follows. First, an average  
154 value of cell fluorescence of the -Ag sample is calculated (from >100 cells imaged in this condition).  
155 The fold change is then calculated by dividing fluorescence of each cell of the +Ag sample by this  
156 average value of the -Ag sample. This is repeated for all replicas and pooled to obtain the mean  
157 and SEM of stimulated fold change of phosphorylation which are shown in Figure 4F in the main  
158 text.

### 159 160 **Fluorescence Recovery after Photobleaching (FRAP)**

161 FRAP experiments were performed in Zeiss 710 confocal microscope equipped with a high  
162 power 488 nm laser source, an oil-immersion, 40×, 1.2 NA objective, and a sensitive photomultiplier  
163 tube detector. In a typical FRAP experiment, a circular region of interest (ROI) of 3.5 µm diameter  
164 (bleached ROI) on the ventral surface of fluorescently labelled cell was photobleached with high  
165 power 405 nm laser (100% laser power). The fluorescence recovery of this spot is recorded at low  
166 laser power (0.2% laser power). We also simultaneously recorded fluorescence of an unbleached  
167 spot of same size on the cell (reference ROI) and a spot outside the cell as background ROI. In  
168 addition, five time-lapse images of all three ROIs were taken before photobleaching of the bleached  
169 ROI to create normalized FRAP curves. All measurements were carried out at room temperature.  
170 The spatial resolution of FRAP is determined by the size of the bleached ROI which in our case is  
171 3.5 µm.

172

173 The experimental fluorescence counts against time of the bleached ROI is background-  
174 corrected (by subtracting the background ROI counts) and normalized using the fluorescence  
175 counts of the reference ROI and pre-bleaching intensity counts such that normalized fluorescence  
176 before photobleaching equals to 1 ( $F_{\text{normalized}}(t < 0) = 1$ ; pre-bleaching) and at the time of  
177 photobleaching is zero ( $F_{\text{normalized}}(t = 0) = 0$ ; at the bleaching). This is done using FRAPAnalyser  
178 (12). The normalized recovery curve (normalized intensity ( $F_{\text{normalized}}(t \geq 0)$ ) against time ( $t \geq 0$ ))  
179 post-bleaching was fitted with a single-exponential model (Eqn S1) using Igor Pro (Version 8;  
180 WaveMetrics, OR, USA). The saturation value of the fitted curve at long time (i.e., when recovery is  
181 completed),  $F_{\text{max}}$ , is the mobile fraction while time scale of diffusion is given by the recovery time  
182 ( $\tau_{1/2}$ ) of the bleached spot.

$$183 \quad F_{\text{normalized}}(t \geq 0) = F_{\text{max}} \left[ 1 - \exp\left(-\frac{t}{\tau_{1/2}}\right) \right] \quad (\text{S1})$$

184  
185 FRAP experiments are performed on multiple cells for a given condition from at least three  
186 independent samples. Recovery time and mobile fraction of individual cells were determined using  
187 Eqn S1. Statistical significance of these parameters between two conditions were done by Mann-  
188 Whitney test.

189  
190 **Preparation of detergent resistant membrane (DRM) imaging samples**  
191 The entire DRM preparation was done in an ice bath. First, a pair of MatTek dishes  
192 containing fluorescently labelled cells were first placed in the ice bath for 10 min followed by  
193 washing with BSS once. In the experiment dish (+TX100), the cells were treated with 1 mL of 0.04%  
194 (v/v) cold TX100 in BSS while the control dish (-TX100) was treated with 1 mL of cold BSS for 10  
195 min. The cells were then fixed with 4% paraformaldehyde and 0.1% glutaraldehyde in PBS for 10  
196 min followed by quenching by 10 mg/mL BSA in PBS for another 20 min. The fixed cells were  
197 washed with PBS and stored in fresh PBS at 4°C and imaged within 2 days.

### 198 **TIRF imaging**

199 Fluorescently labeled RBL cells were imaged with a home-built total internal reflection  
200 fluorescence microscope (TIRFM) (DMIRB, Leica Microsystems, Germany) equipped with an oil  
201 immersion objective (PlanApo, 100×, NA 1.47; Leica Microsystems, Germany), a 488 nm excitation  
202 laser (Coherent, Santa Clara, CA), and an electron multiplying charge coupled device (EMCCD)  
203 camera (black illuminated Andor iXON3 897, pixel size 16 μm, Andor Technology, Belfast, UK). The  
204 excitation laser beam was introduced and focused on the back focal plane of the objective by a pair  
205 of tilting mirrors and a dichroic mirror (ZT405/488/561/640rpc, Chroma Technology). The same set  
206 of mirrors was used to adjust the TIRF angle of the excitation beam to illuminate the ventral  
207 membrane. The fluorescence signal from the sample was recorded by the EMCCD camera after it  
208 passes through the same objective and the dichroic mirror and reflected to the camera chip after  
209 being filtered by an emission filter (ZET488/561m, Chroma Technology). For both DRM and live cell  
210 imaging, 100 TIRF images were taken with 10 ms exposure time. Andor Solis software was used  
211 for image acquisition. The laser power was 50 μW before objective. All measurements were carried  
212 out at room temperature.

### 213 **Quantification of DRM fraction imaging**

214 About 30 cells expressing a given probe were imaged for each of the +TX100 and -TX100  
215 samples using the above TIRF imaging protocol. The average background-corrected fluorescence  
216 count of each cell was calculated by subtracting background (from a region outside the cell) from  
217 the average fluorescence signal of the region inside that cell using FIJI/ImageJ (11). This yields a  
218 range of background-corrected fluorescence counts per cell before (-TX100 sample) and after  
219 (+TX100 sample) detergent treatment. The distributions were subjected to non-parametric Mann-  
220 Whitney test to check whether the fluorescence of the cells from both samples belong to the same  
221 distribution. The null hypothesis ( $P > 0.05$ ) for this test was that a randomly selected fluorescent  
222 values both a +TX100 and a -TX100 sample belong to the same distribution. In this case ( $P > 0.05$ ),  
223 we consider the probe is completely detergent-resistant under the experimental condition. If a probe  
224 is detergent-soluble, the Mann-Whitney test between -TX100 and +TX100 samples returns a  $P$   
225 value  $< 0.05$ . The extent of detergent-resistance is then quantified as the Resistance factor ( $R$ ),  
226 which is calculated as (Eqn S2):  
227

$$R = \frac{\text{Median background-corrected fluorescence of (+)TX100 sample}}{\text{Median background-corrected fluorescence of (-)TX100 sample}} \quad (\text{S2})$$

228  
229 An  $R$  value of 1 suggests complete resistance (i.e.,  $P > 0.05$  between -TX100 and +TX100  
230 samples) while  $R$  equals to zero for complete solubility of a probe in 0.04% TX100. An intermediate  
231 value of  $R$  indicates partial detergent-resistance. Typically, DRM imaging for a probe was  
232 performed twice for a given conditions (-Ag or +Ag).  
233

234 The mean and error of  $R$  value were determined by bootstrapping with 50% of the data.  
235 Briefly, we first randomly sub-sampled 50% of the cells (e.g., 15 out of 30 cells) from both -TX100  
236 and +TX100 samples from a biological replica. An  $R$  value was then determined from the median  
237 values of background corrected fluorescence per cell from these sub-samples according to Eqn S2.  
238 These sub-sampling steps were repeated for 10000 times and subsequently 10000  $R$  values were  
239 determined. This method was then repeated for all biological replicas to obtain a total of 10000\*n  $R$   
240 values where  $n$  = number of biological replicas. The arithmetic average of these 10000\*n  $R$  values  
241 is reported in the main text, while the error ( $\pm$  values) represent standard deviation/ $\sqrt{n}$ .  
242

#### 243 **Data acquisition of ImFCS and ACF analysis to determine diffusion coefficient ( $D$ ) values**

244 The data acquisition protocol for ImFCS and following autocorrelation function (ACF)  
245 analysis were described previously (13). Briefly, a stack of 80,000 images from a ROI on the ventral  
246 plasma membrane was recorded at an acquisition speed of 3.5 ms/frame using the TIRF  
247 microscope and EMCCD camera described above and saved as .fits or .tif file. The ROI size for  
248 different cells was between 40×40 to 50×50 pixels with pixel size of 160 nm in the object plane. All  
249 measurements were carried out at room temperature.  
250

251 This raw image stack was further processed by a FIJI (11) plug-in for ImFCS (Imaging\_FCS  
252 1.491; available at [http://www.dbs.nus.edu.sg/lab/BFL/imfcs\\_image\\_j\\_plugin.html](http://www.dbs.nus.edu.sg/lab/BFL/imfcs_image_j_plugin.html)). Raw temporal  
253 autocorrelation function (ACF) ( $G(\tau)$ ) were computed from each 2×2 binned pixels ( $P \times$  unit; length =  
254 320 nm) of an image stack and fitted with Eqn S3 (14). This yields a map of lateral diffusion  
255 coefficient ( $D$ ) value. The spatial resolution of this map is 320 nm.

256

$$G(\tau) = \frac{1}{N} \left( \frac{\operatorname{erf}(p(\tau)) + \frac{(e^{-(p(\tau))^2} - 1)}{\sqrt{\pi} p(\tau)}}{\operatorname{erf}\left(\frac{a}{\omega_0}\right) + \frac{\omega_0}{a\sqrt{\pi}} \left( e^{-\frac{a^2}{\omega_0^2}} - 1 \right)} \right)^2 + G_\infty; \quad p(\tau) = \frac{a}{\sqrt{4D\tau + \omega_0^2}} \quad (\text{S3})$$

257 In the above equation,  $G(\tau)$  is the ACF as a function of lag time ( $\tau$ ),  $N$  is the number of  
258 particles diffusing within a Px unit,  $D$  is the lateral diffusion coefficient in the Px unit,  $a$  is the length  
259 of the Px unit in the object plane (320 nm),  $\omega_0$  is the point spread function (PSF) of the microscope,  
260  $G_\infty$  is the convergence value of  $G(\tau)$  at very large lag times. We used  $N$ ,  $D$  and  $G_\infty$  as fit  
261 parameters, and  $\omega_0$  was experimentally determined using the method described previously (15).

262 Construction of cumulative distribution function (CDF) of  $D$  and determination of Stimulated  
263 %change of  $D_{av}$  as shown in Figure 2-6 in the main text

264 After combining  $D$  values obtained from multiple cells over multiple preparations for a given  
265 condition (red: - Ag or black: + Ag), this large data set was 30 times resampled by bootstrapping  
266 with 50% of the data (See Appendix in the end of the SI for more detail on the bootstrapping  
267 analysis). Individual CDFs were then created from each bootstrapped sub-sample, and these are  
268 overlaid in Figures 2-6 in the main text. The associated % change of  $D_{av}$  was determined as follows:  
269 First, mean values of one, randomly selected, bootstrapped sub-sample for each of - Ag and + Ag  
270 conditions are determined ( $D_{BS,-Ag}$  and  $D_{BS,+Ag}$ ). The stimulated %change of  $D_{av}$  for this pair is  
271 calculated as:  $(D_{BS,+Ag} - D_{BS,-Ag}) * 100\% / D_{BS,-Ag}$ . This process for randomly selected pairs is repeated  
272 10,000 times, and a histogram of %change of  $D_{av}$  is created.

273

274

275

276

277

278

279

280

281

282

283

284 **SI Figures**  
 285  
 286 **Figure S1**

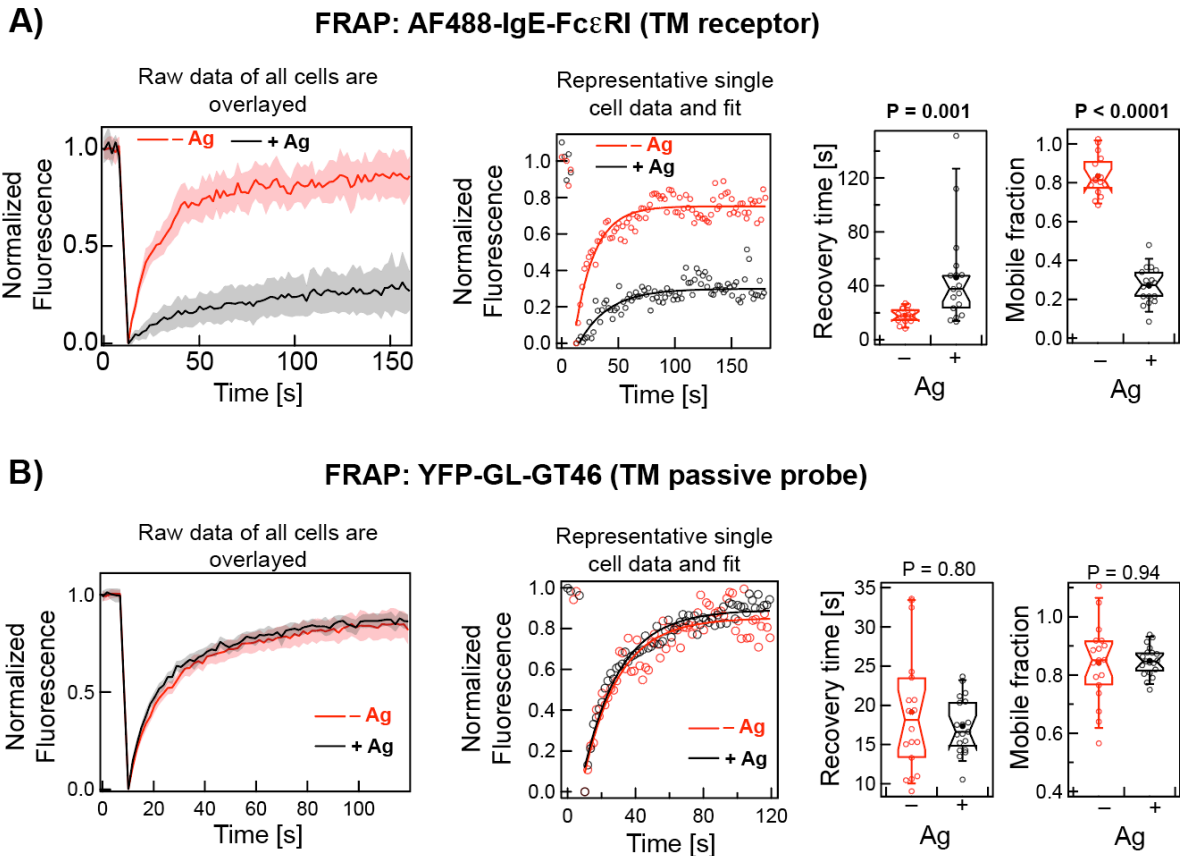

287 **Figure S1.** FRAP data for A) TM receptor AF488-IgE-FcεRI, and B) Ld-preferring, passive TM probe, YFP-GL-GT46 in –  
 288 /+ Ag conditions in RBL cells. The first panels of figures A and B show normalized FRAP curves of specified probe from  
 289 multiple cells in – Ag (pink) and + Ag (grey) conditions. The solid red and black curves are the average of the pink and  
 290 grey curves respectively. The second panels show representative raw fluorescence recovery curves (circle) and  
 291 corresponding fits (solid line using Eqn S1) of specified probe under – Ag (red) and + Ag (black) conditions. The last two  
 292 panels show the fitted values of recovery time and mobile fraction from multiple cells, respectively, as box plots (Eqn S1  
 293 defines these parameters). The box height corresponds to 25<sup>th</sup> to 75<sup>th</sup> percentile and error bars represent 9<sup>th</sup> to 91<sup>st</sup>  
 294 percentile of entire data set. Mean and median values are represented as solid circle and bar, respectively, located inside  
 295 the box. The notches signify 95% confidence interval of the median. Number of cells for AF488-IgE-FcεRI: 15 (– Ag) and  
 296 17 (+ Ag); and for YFP-GL-GT46: 18 (– Ag) and 19 (+ Ag).  
 297

298



**A) DRM: AF488-IgE-FcεRI (TM receptor)**

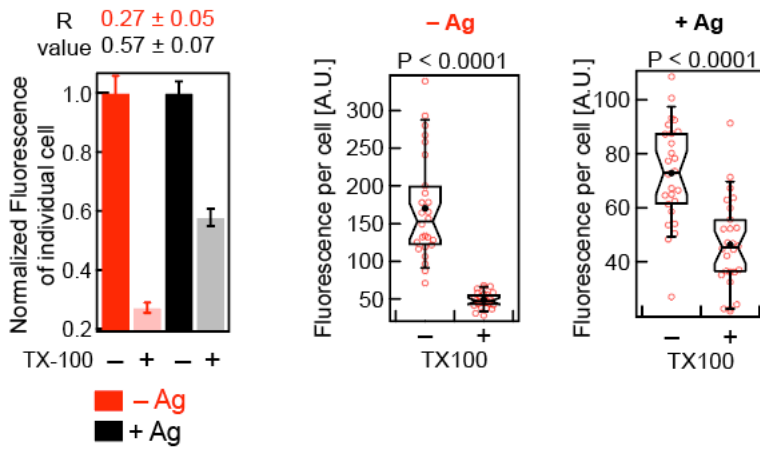

**B) DRM: YFP-GL-GT46 (TM passive probe)**

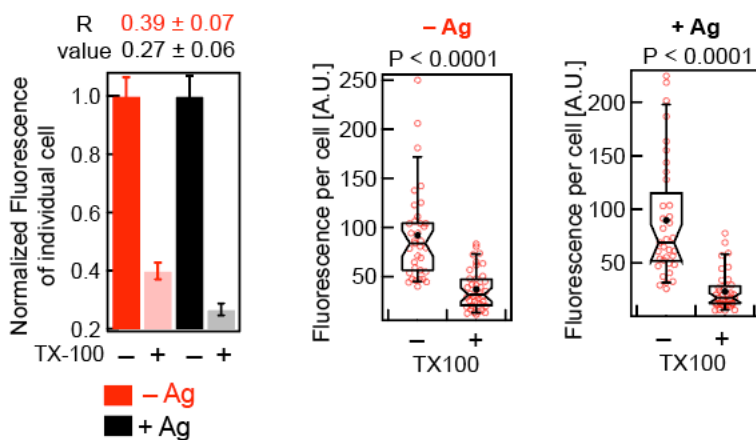

300  
 301 **Figure S2.** DRM results for A) TM receptor AF488-IgE-FcεRI, and B) Ld-preferring, passive TM probe, YFP-GL-GT46  
 302 under -/+ Ag conditions in RBL cells. In the left panel, the relative loss of fluorescence and the corresponding  $R$  value  
 303 (Eqn S2) after 0.04% TX100 treatment for the probes in -/+ Ag conditions for both probes. Each bar represents data from  
 304 60-90 cells from 2-3 independent experiments. The box plots in the right panel show raw fluorescence values of ~30 cells  
 305 from a single representative experiment for each of -/+ Ag and -/+ TX100 conditions. Box parameters described in legend  
 306 to Figure S1.

307

**A) DRM: PM-EGFP (inner leaflet, Lo-probe)**

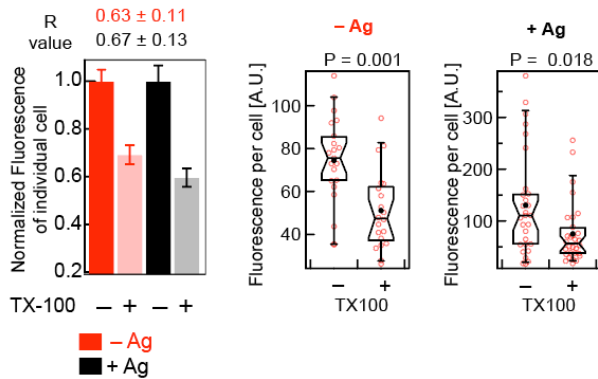

**B) DRM: EGFP-GG (inner leaflet, Ld-probe)**

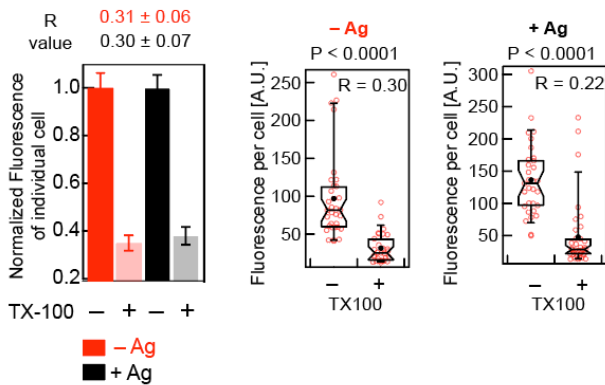

**C) DRM: S15-EGFP (inner leaflet, Ld-probe)**

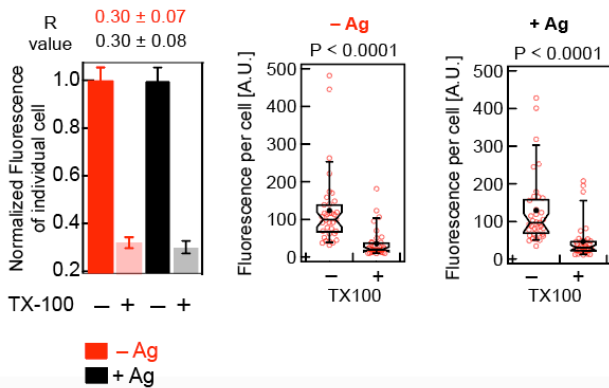

309

310 **Figure S3.** DRM results for the lipid probes under  $-/+$  Ag conditions in RBL cells: A) PM-EGFP, B) EGFP-GG, and C)  
 311 S15-EGFP. Left panel shows relative loss of fluorescence and the corresponding  $R$  value (Eqn S2) upon 0.04% TX100  
 312 treatment for the probes in  $-/+$  Ag conditions. Each bar represents data from 60-90 cells from 2-3 independent sample  
 313 preparations. Right panels show box plots of raw fluorescence values of  $\sim 30$  cells for each of  $-/+$  TX100 conditions from a  
 314 representative experiment. Box parameters described in legend to Figure S1.

315

316

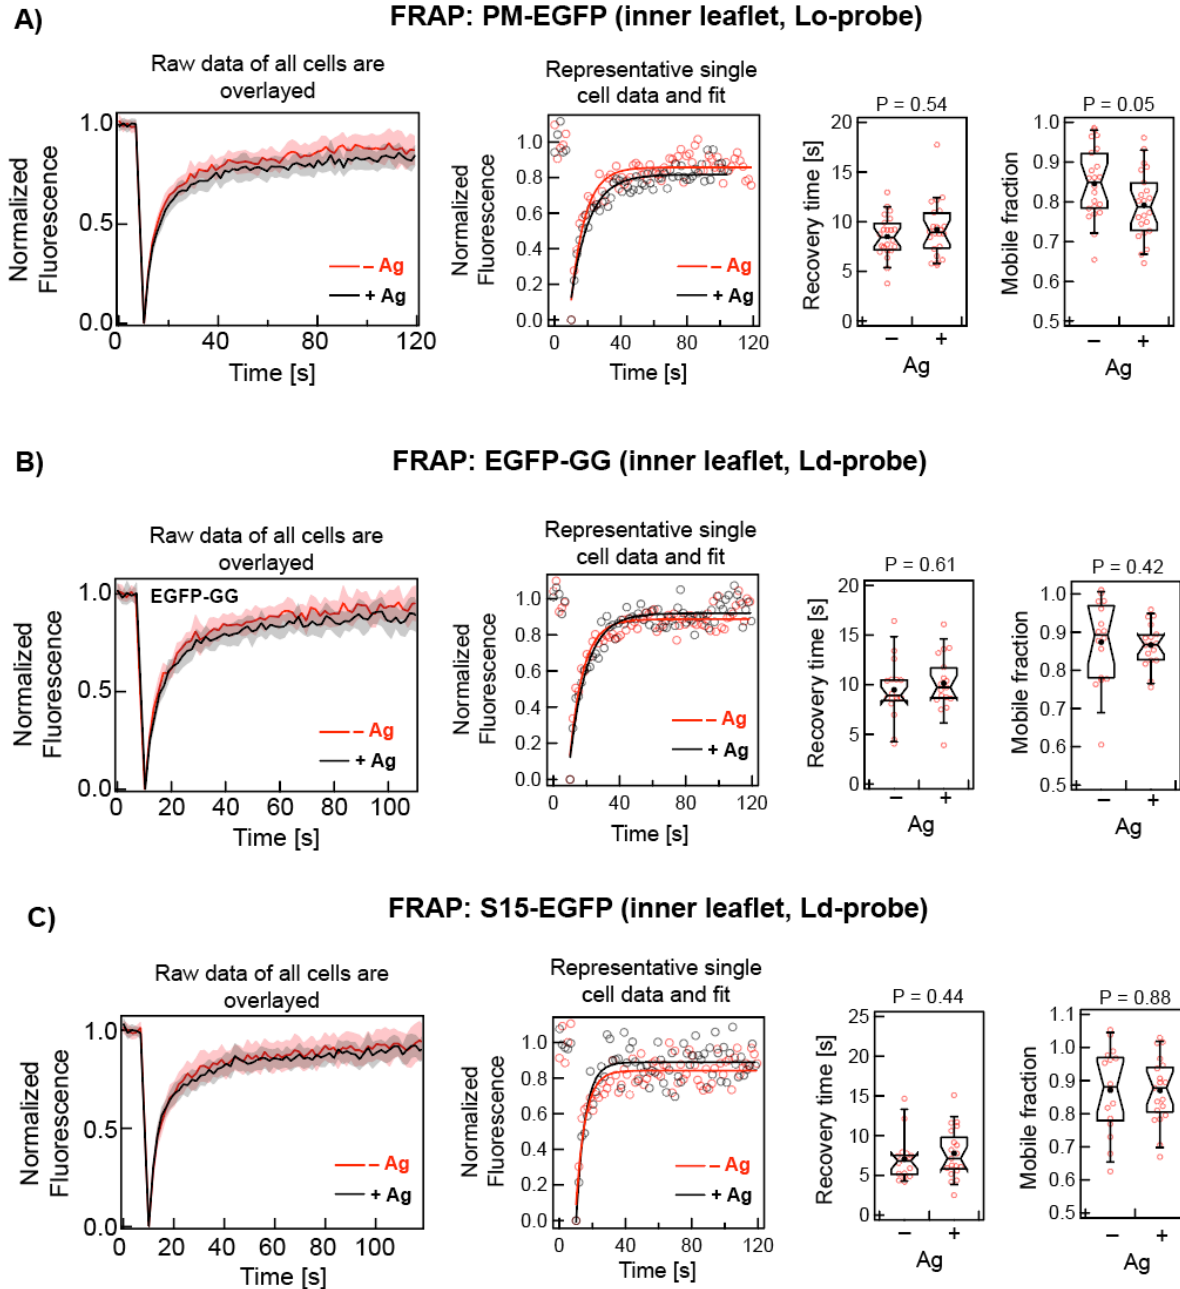

318

319 **Figure S4.** FRAP results for lipid probes under  $-/+$  Ag conditions in RBL cells: A) PM-EGFP, B) EGFP-GG, and C) S15-  
 320 EGFP. The first panels in A-C show normalized FRAP curves of the corresponding probe from multiple cells in  $-$  Ag (pink)  
 321 and  $+$  Ag (grey) conditions. Second panels in A-C show representative raw fluorescence recovery curves (circle) and  
 322 corresponding fits (solid line using Eqn S1) of the specified probe under  $-$  Ag (red) and  $+$  Ag (black) conditions. Third and  
 323 fourth panels show fitted values of recovery time and mobile fraction, respectively, from multiple cells as box plots (Eqn  
 324 S1 defines these parameters). Box parameters are described in legend to Figure S1. Number of cells for PM-EGFP: 22 ( $-$   
 325 Ag) and 22 ( $+$  Ag); for EGFP-GG: 16 ( $-$  Ag) and 17 ( $+$  Ag); for S15-EGFP: 16 ( $-$  Ag) and 19 ( $+$  Ag).

326

327

328 Figure S5

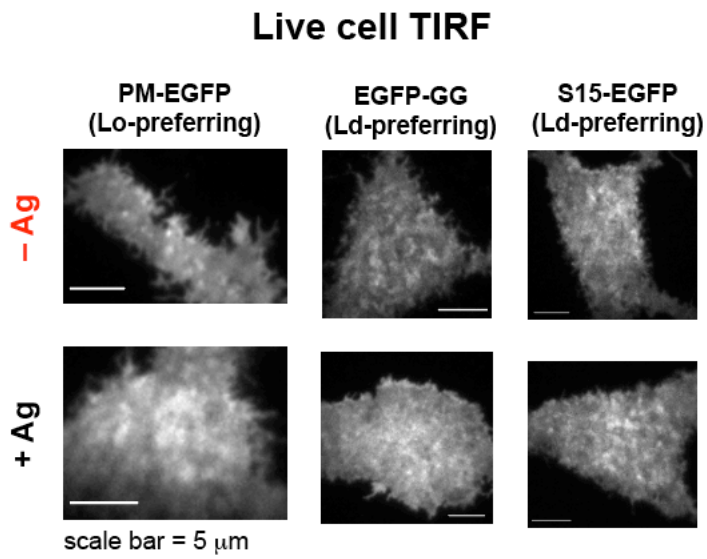

329

330 **Figure S5.** Representative live cell TIRFM images of specified lipid probes under  $-/+$  Ag conditions in RBL cells.

331

332

333

334

335

336

337

338

339

340

341

342

343

344

345

346

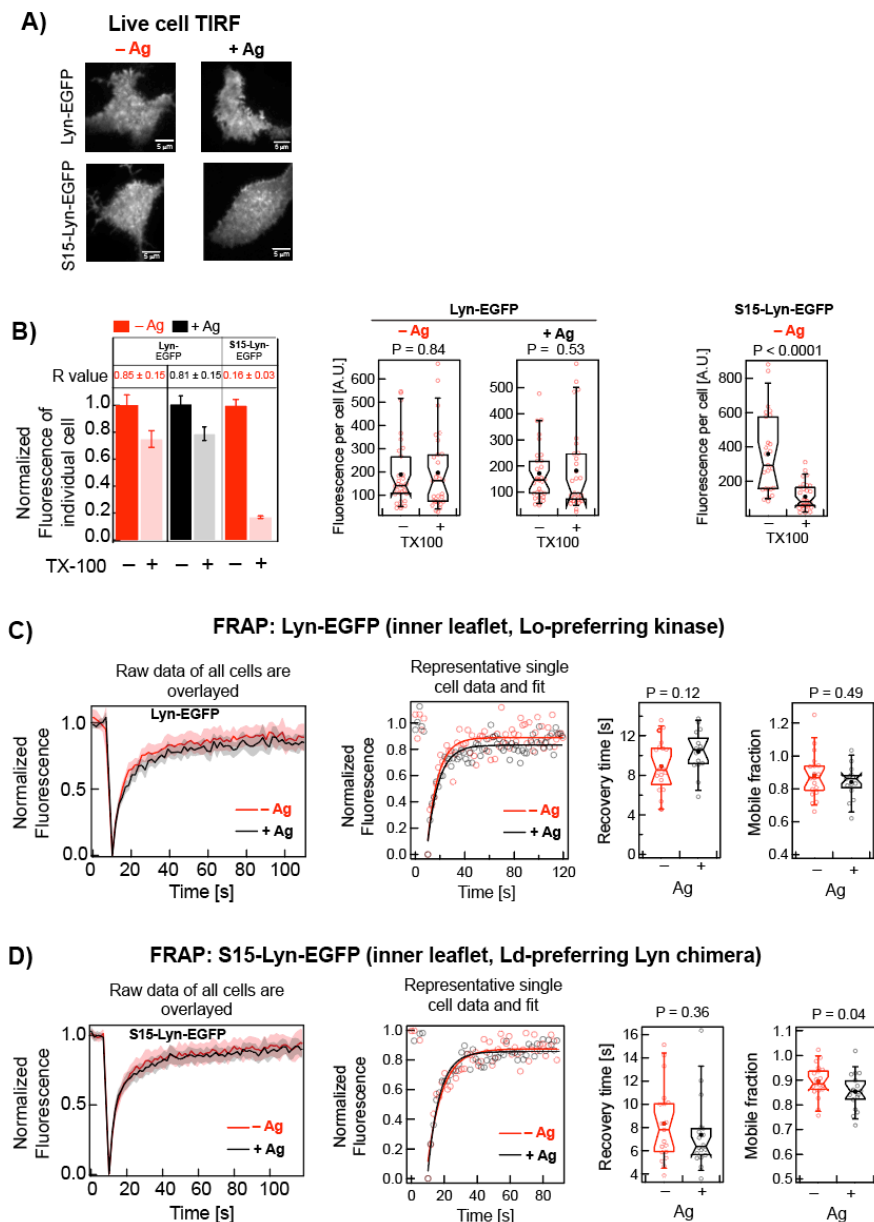

348

**Figure S6.** Comparison of the biophysical properties of Lyn-EGFP and S15-Lyn-EGFP under  $-/+$  Ag conditions in RBL cells. A) Representative live cell TIRF images. B) DRM results: Left panels show relative loss of fluorescence and the corresponding  $R$  values (Eqn S2) after 0.04% TX100 treatment. Each bar represents data from 60-90 cells from 2-3 independent experiments. Right panels show box plots of raw fluorescence values of  $\sim 30$  cells for each of  $-/+$  TX100 conditions from a representative experiment. C-D) FRAP results: The first panels show normalized FRAP curves of the corresponding probe from multiple cells in  $-$  Ag (pink) and  $+$  Ag (grey) conditions. Second panels show representative raw fluorescence recovery curves (circle) and corresponding fits (solid line, Eqn S1) for specified probe under  $-$  Ag (red) and  $+$  Ag (black) conditions. Third and fourth panels show box plots of fitted values of recovery time and mobile fraction, respectively, from multiple cells (Eqn 1 defines these parameters). Number of cells for Lyn-EGFP: 19 ( $-$  Ag) and 15 ( $+$  Ag); and for S15-Lyn-EGFP: 19 ( $-$  Ag) and 18 ( $+$  Ag). Box plot parameters are described in legend to Figure S1.

359

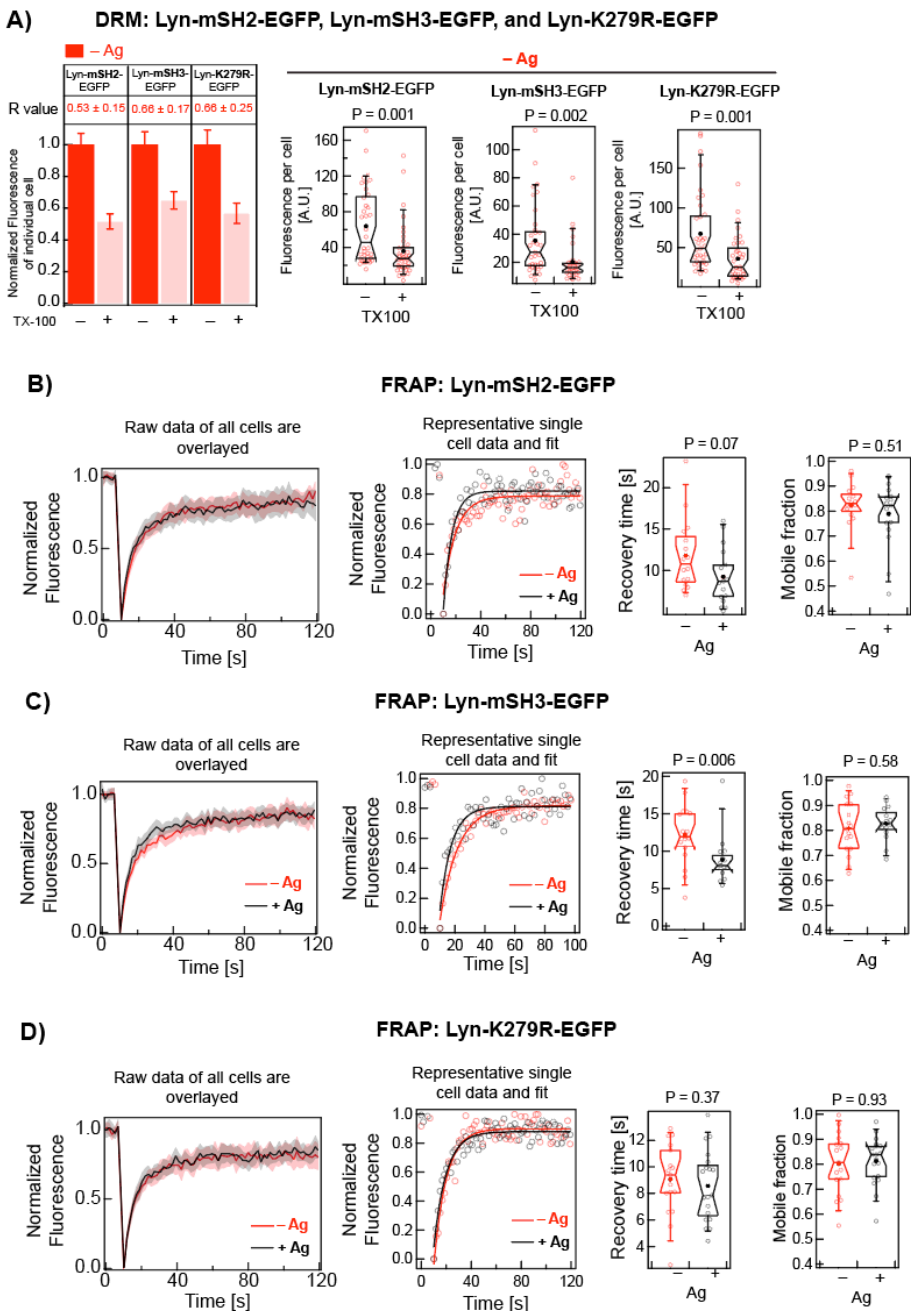

361

362 **Figure S7.** DRM and FRAP results for Lyn variants Lyn-mSH2-EGFP, Lyn-mSH3-EGFP, and Lyn-K279R-EGFP. A)   
 363 DRM results: Left panel shows relative loss of fluorescence and corresponding  $R$  value (Eqn S2) after 0.04% TX100   
 364 treatment. Each bar represents data from 60-90 cells from 2-3 independent experiments. Right panels show box plots of   
 365 raw fluorescence values of ~30 cells for each of -/+ TX100 conditions from a representative experiment. B-D) FRAP   
 366 results: The first panels show normalized FRAP curves of the corresponding probe from multiple cells in - Ag (pink) and +   
 367 Ag (grey) conditions. Second panels show representative raw fluorescence recovery curves (circle) and corresponding fits   
 368 (solid line, Eqn S1) for specified probe under - Ag (red) and + Ag (black) conditions. Third and fourth panels show box   
 369 plots of fitted values of recovery time and mobile fraction, respectively, from multiple cells (Eqn 1 defines these   
 370 parameters). Number of cells for Lyn-mSH2-EGFP: 16 (- Ag) and 17 (+ Ag); for Lyn-mSH3-EGFP: 17 (- Ag) and 15 (+   
 371 Ag); and for Lyn-K279R-EGFP: 17 (- Ag) and 19 (+ Ag). Box plot parameters are described in legend to Figure S1.

372

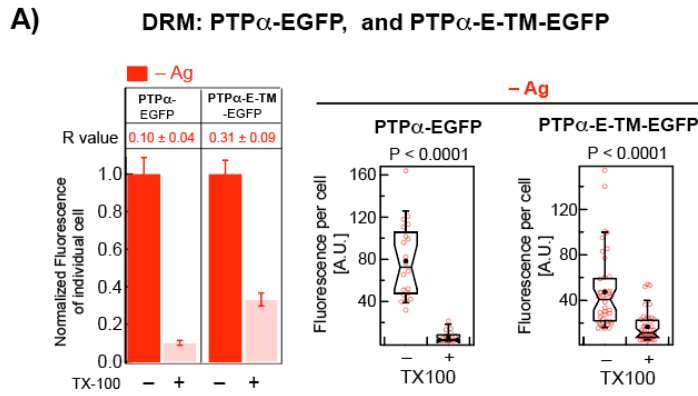

**B) FRAP: PTP $\alpha$ -EGFP (TM phosphatase)**

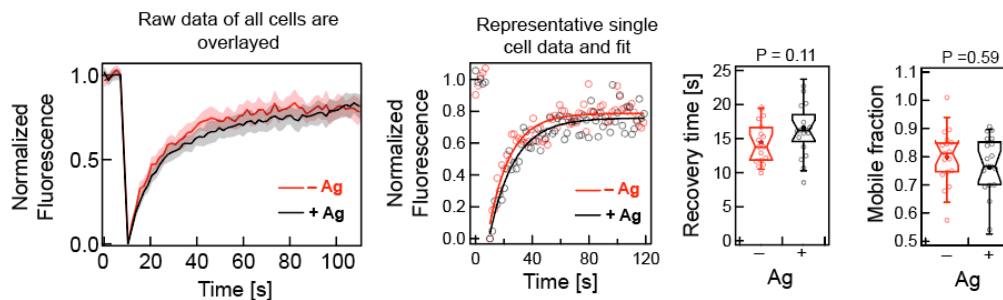

**C) FRAP: PTP $\alpha$ -E-TM-EGFP (TM phosphatase mutant)**

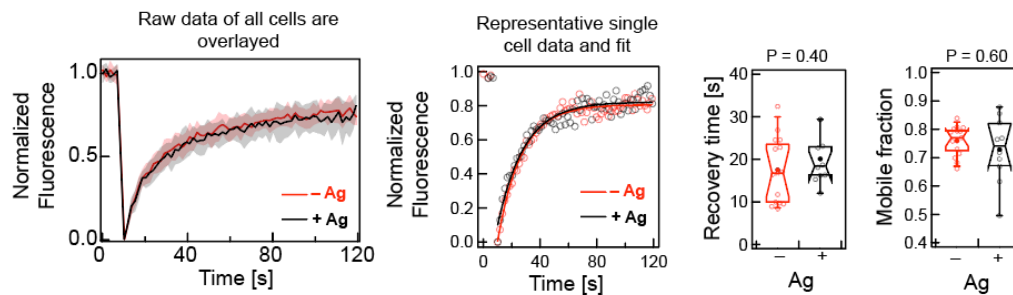

374  
 375 **Figure S8.** DRM and FRAP results for PTP $\alpha$ -EGFP and PTP $\alpha$ -E-TM-EGFP. A) DRM results: Left panels show the relative  
 376 loss of fluorescence and corresponding  $R$  value (Eqn S2) upon 0.04% TX100 treatment. Each bar represents data from  
 377 60-90 cells from 2-3 independent experiments. Right panels show raw fluorescence values of  $\sim$ 30 cells for each of  $-/+$   
 378 TX100 conditions from a representative experiment. B-C) FRAP results: The first panels show normalized FRAP curves of  
 379 the corresponding probe from multiple cells in  $- Ag$  (pink) and  $+ Ag$  (grey) conditions. Second panels show representative  
 380 raw fluorescence recovery curves (circle) and corresponding fits (solid line, Eqn S1) for specified probe under  $- Ag$  (red)  
 381 and  $+ Ag$  (black) conditions. Third and fourth panels show box plots of fitted values of recovery time and mobile fraction,  
 382 respectively, from multiple cells (Eqn 1 defines these parameters). Number of cells for PTP $\alpha$ -EGFP: 17 ( $- Ag$ ) and 19 ( $+ Ag$ );  
 383 and for PTP $\alpha$ -E-TM-EGFP: 15 ( $- Ag$ ) and 10 ( $+ Ag$ ). Box plot parameters are described in legend to Figure S1.

384  
 385  
 386

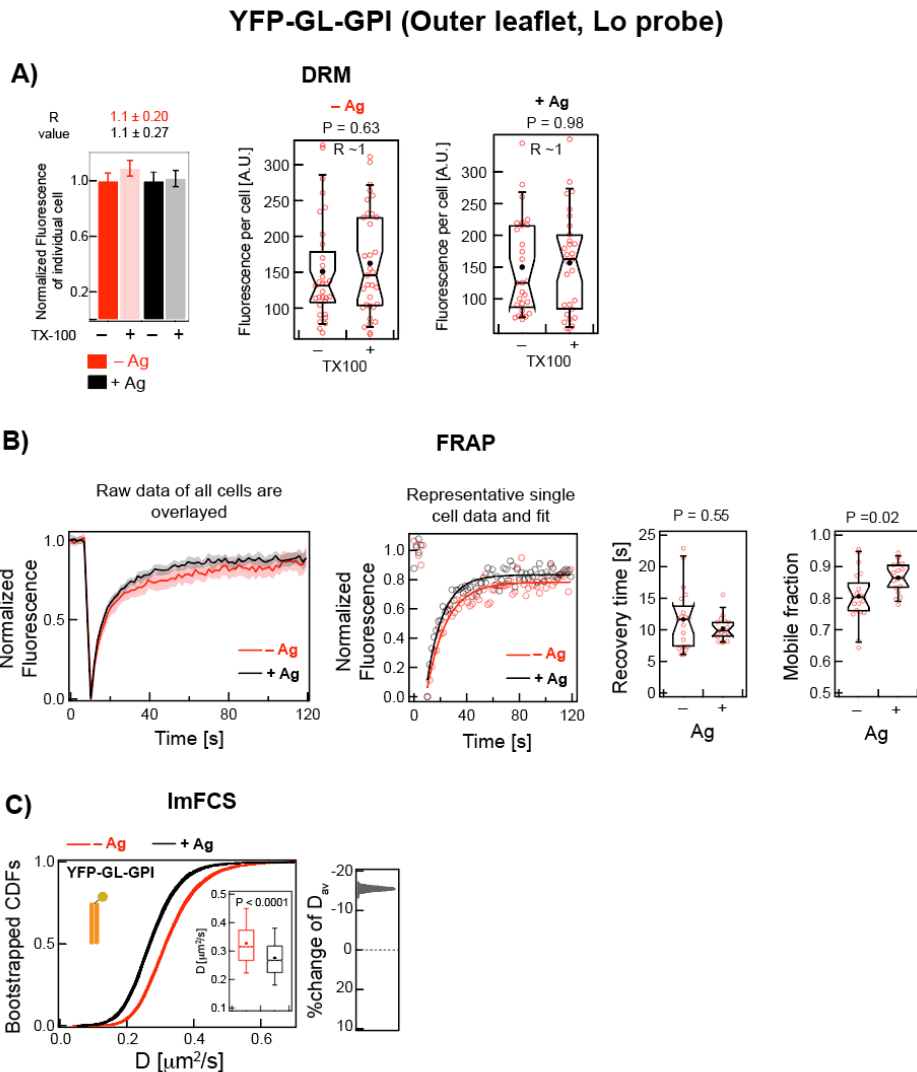

388

389 **Figure S9:** Biophysical characterization of outer leaflet, Lo-preferring lipid probe YFP-GL-GPI in  $-/+$  Ag stimulated  
 390 conditions. A) DRM: In the left panel, the relative loss of fluorescence and the corresponding  $R$  value (Eqn S2) after  
 391 0.04% TX100 treatment for the probes in  $-/+$  Ag conditions for both probes. Each bar represents data from 60-90 cells  
 392 from 2-3 independent experiments. The box plots in the right panel show raw fluorescence values of  $\sim 30$  cells from a  
 393 single representative experiment for each of  $-/+$  Ag and  $-/+$  TX100 conditions. B) FRAP: The first panel shows normalized  
 394 FRAP curves from multiple cells in  $-$  Ag (pink) and  $+$  Ag (grey) conditions. Second panels show representative raw  
 395 fluorescence recovery curves (circle) and corresponding fits (solid line, Eqn S1) under  $-$  Ag (red) and  $+$  Ag (black)  
 396 conditions. Third and fourth panels show box plots of fitted values of recovery time and mobile fraction, respectively,  
 397 from multiple cells (Eqn 1 defines these parameters). Number of cells for FRAP measurements: 18 ( $-$  Ag) and 19 ( $+$  Ag). C)  
 398 ImFCS: 30 bootstrapped CDFs of  $D$  values from ImFCS measurements are overlaid for specified conditions ( $-/+$  Ag). Box  
 399 plots of all  $D$  values and stimulated  $\% \text{change of } D_{av}$  for these samples are shown as described for Figure 2E. Box  
 400 parameters described in legend to Figure S1. Table S1 shows number of ACF and cells measured for ImFCS analyses.

401  
 402  
 403  
 404



**Table S1.** Fitting results of experimental CDFs of  $D$  values for all membrane probes in resting and Ag-stimulated steady-states

| Probes                     | Membrane association                                                    | Stimulation     | $D_{av}$ [ $\mu\text{m}^2/\text{s}$ ] <sup>a</sup> | $D_{fast}$ [ $\mu\text{m}^2/\text{s}$ ] <sup>b</sup> | $D_{slow}$ [ $\mu\text{m}^2/\text{s}$ ] <sup>b</sup> | $F_{slow}$ <sup>b</sup> | $N_{Px}$ (No. of cells) <sup>d</sup> |
|----------------------------|-------------------------------------------------------------------------|-----------------|----------------------------------------------------|------------------------------------------------------|------------------------------------------------------|-------------------------|--------------------------------------|
| AF488-IgE-Fc $\epsilon$ RI | TM, receptor for IgE                                                    | No <sup>#</sup> | 0.168 $\pm$ 0.0004<br>(0.167-0.168)                | 0.22 $\pm$ 0.002                                     | 0.14 $\pm$ 0.001                                     | 0.71 $\pm$ 0.02         | 24582 (42)                           |
|                            |                                                                         | Yes             | 0.117 $\pm$ 0.0005<br>(0.116-0.118)                | 0.16 $\pm$ 0.004                                     | 0.10 $\pm$ 0.002                                     | 0.72 $\pm$ 0.03         | 10403 (17)                           |
| PM-EGFP                    | Inner leaflet, Lo-preferring, passive lipid probe                       | No <sup>#</sup> | 0.62 $\pm$ 0.002<br>(0.611-0.619)                  | 0.68 $\pm$ 0.01                                      | 0.58 $\pm$ 0.006                                     | 0.63 $\pm$ 0.06         | 9375 (15)                            |
|                            |                                                                         | Yes             | 0.57 $\pm$ 0.002<br>(0.567-0.573)                  | 0.70 $\pm$ 0.03                                      | 0.53 $\pm$ 0.009                                     | 0.79 $\pm$ 0.07         | 9375 (15)                            |
| EGFP-GG                    | Inner leaflet, Ld-preferring, passive lipid probe                       | No <sup>#</sup> | 0.64 $\pm$ 0.002<br>(0.634-0.643)                  | 0.66 $\pm$ 0.005                                     | 0.61 $\pm$ 0.004                                     | 0.43 $\pm$ 0.05         | 10527 (18)                           |
|                            |                                                                         | Yes             | 0.69 $\pm$ 0.002<br>(0.685-0.691)                  | 0.74 $\pm$ 0.009                                     | 0.57 $\pm$ 0.01                                      | 0.31 $\pm$ 0.07         | 9775 (17)                            |
| S15-EGFP                   | Inner leaflet, Ld-preferring, passive lipid probe                       | No              | 0.90 $\pm$ 0.003<br>(0.894-0.904)                  | 0.90 $\pm$ 0.004 <sup>c</sup>                        | 0.90 $\pm$ 0.004 <sup>c</sup>                        | 0.50 <sup>c</sup>       | 7474 (17)                            |
|                            |                                                                         | Yes             | 0.92 $\pm$ 0.003<br>(0.911-0.922)                  | 0.91 $\pm$ 0.004 <sup>c</sup>                        | 0.91 $\pm$ 0.004 <sup>c</sup>                        | 0.50 <sup>c</sup>       | 8050 (19)                            |
| Lyn-EGFP                   | Inner leaflet, Lo-preferring, kinase                                    | No <sup>#</sup> | 0.49 $\pm$ 0.001<br>(0.484-0.489)                  | 0.57 $\pm$ 0.03                                      | 0.44 $\pm$ 0.008                                     | 0.65 $\pm$ 0.13         | 10000 (16)                           |
|                            |                                                                         | Yes             | 0.44 $\pm$ 0.001<br>(0.438-0.443)                  | 0.50 $\pm$ 0.02                                      | 0.40 $\pm$ 0.02                                      | 0.61 $\pm$ 0.18         | 10625 (17)                           |
| S15-Lyn-EGFP               | Ld-preferring Lyn chimera; myristoylated lipid anchor                   | No              | 0.64 $\pm$ 0.002<br>(0.638-0.647)                  | 0.64 $\pm$ 0.002 <sup>c</sup>                        | 0.64 $\pm$ 0.002 <sup>c</sup>                        | 0.50 <sup>c</sup>       | 7073 (16)                            |
|                            |                                                                         | Yes             | 0.67 $\pm$ 0.002<br>(0.663-0.670)                  | 0.67 $\pm$ 0.01 <sup>c</sup>                         | 0.67 $\pm$ 0.01 <sup>c</sup>                         | 0.50 <sup>c</sup>       | 7725 (16)                            |
| Lyn-mSH2-EGFP              | Lyn mutant; Arg to Ala at position 135 of SH2 module                    | No              | 0.48 $\pm$ 0.002<br>(0.480-0.486)                  | 0.48 $\pm$ 0.002 <sup>c</sup>                        | 0.48 $\pm$ 0.002 <sup>c</sup>                        | 0.50 <sup>c</sup>       | 9946 (16)                            |
|                            |                                                                         | Yes             | 0.51 $\pm$ 0.001<br>(0.509-0.515)                  | 0.57 $\pm$ 0.01                                      | 0.45 $\pm$ 0.008                                     | 0.48 $\pm$ 0.07         | 8125 (13)                            |
| Lyn-mSH3-EGFP              | Lyn mutant; Trp to Ala at position 78 of SH3 module                     | No              | 0.51 $\pm$ 0.002<br>(0.502-0.508)                  | 0.67 $\pm$ 0.04                                      | 0.47 $\pm$ 0.01                                      | 0.82 $\pm$ 0.07         | 11250 (18)                           |
|                            |                                                                         | Yes             | 0.49 $\pm$ 0.001<br>(0.487-0.492)                  | 0.54 $\pm$ 0.01                                      | 0.40 $\pm$ 0.01                                      | 0.38 $\pm$ 0.08         | 11778 (19)                           |
| Lyn-K279R-EGFP             | Kinase-inactive Lyn mutant; Lys to Arg at position 279 of kinase module | No              | 0.62 $\pm$ 0.002<br>(0.616-0.623)                  | 0.62 $\pm$ 0.002 <sup>c</sup>                        | 0.62 $\pm$ 0.002 <sup>c</sup>                        | 0.50 <sup>c</sup>       | 8827 (15)                            |
|                            |                                                                         | Yes             | 0.59 $\pm$ 0.002<br>(0.586-0.592)                  | 0.70 $\pm$ 0.03                                      | 0.55 $\pm$ 0.01                                      | 0.75 $\pm$ 0.07         | 9359 (14)                            |
| YFP-GL-GPI                 | Outer leaflet, Lo-preferring lipid probe, non-functional                | No <sup>#</sup> | 0.328 $\pm$ 0.0008<br>(0.326-0.329)                | 0.40 $\pm$ 0.006                                     | 0.30 $\pm$ 0.002                                     | 0.71 $\pm$ 0.03         | 12892 (21)                           |
|                            |                                                                         | Yes             | 0.276 $\pm$ 0.0009<br>(0.274-0.278)                | 0.34 $\pm$ 0.01                                      | 0.24 $\pm$ 0.002                                     | 0.76 $\pm$ 0.05         | 7757 (14)                            |
| PTP $\alpha$ -EGFP         | TM; tyrosine phosphatase                                                | No              | 0.227 $\pm$ 0.0006<br>(0.226-0.228)                | 0.27 $\pm$ 0.007                                     | 0.21 $\pm$ 0.003                                     | 0.70 $\pm$ 0.06         | 10975 (18)                           |
|                            |                                                                         | Yes             | 0.199 $\pm$ 0.0005<br>(0.198-0.200)                | 0.24 $\pm$ 0.003                                     | 0.18 $\pm$ 0.002                                     | 0.64 $\pm$ 0.03         | 12132 (20)                           |
| PTP $\alpha$ -E-TM-EGFP    | TM; PTP $\alpha$ mutant, no cytoplasmic module                          | No              | 0.266 $\pm$ 0.0008<br>(0.265-0.268)                | 0.33 $\pm$ 0.007                                     | 0.24 $\pm$ 0.003                                     | 0.71 $\pm$ 0.04         | 8618 (15)                            |
|                            |                                                                         | Yes             | 0.240 $\pm$ 0.0006<br>(0.239-0.242)                | 0.29 $\pm$ 0.007                                     | 0.22 $\pm$ 0.004                                     | 0.67 $\pm$ 0.06         | 8300 (14)                            |
| YFP-GL-GT46                | TM; passive probe                                                       | No              | 0.235 $\pm$ 0.0008<br>(0.233-0.236)                | 0.31 $\pm$ 0.007                                     | 0.21 $\pm$ 0.002                                     | 0.78 $\pm$ 0.02         | 7740 (13)                            |
|                            |                                                                         | Yes             | 0.211 $\pm$ 0.0005<br>(0.210-0.212)                | 0.24 $\pm$ 0.007                                     | 0.19 $\pm$ 0.003                                     | 0.60 $\pm$ 0.02         | 9929 (16)                            |

407 <sup>a</sup> ± values are standard error of the mean (SEM) of the arithmetic average ( $D_{av}$ ) of all  $D$  values. Corresponding  
408 95% confidence interval (CI) is given in parenthesis.

409 <sup>b</sup> ± values are standard deviations of the mean values obtained from the one-component (Eqn A1) or two-  
410 component (Eqn A2) fitting of 30 individual bootstrapped CDFs (composed of 50% of all data each time)

411 <sup>c</sup> Values correspond to single component fit (Eqn A1);  $D_{fast} = D_{slow}$ ,  $F_{fast} = F_{slow} = 0.50$

412 <sup>d</sup>  $N_{Px}$  = number of Px units from which  $D$  values are determined

413 #Raw data previously published in reference (13)

414 Lo = liquid ordered; Ld = liquid disordered; TM = transmembrane

415 PM = palmitoyl/myristoyl; GG = geranylgeranyl; EGFP = enhanced green fluorescent protein; YFP = yellow  
416 fluorescent protein

417

## 418 **DETAILED ANALYSIS AND BOOTSTRAPPING OF ImFCS DATA**

419

420 *Pooling of  $D$  values obtained from ImFCS measurements on multiple cells and bootstrapping of raw*  
421  *$D$  CDF followed by component analysis*

422 The  $D$  values obtained in Px units (Eqn S3) from multiple cells for a given probe at a given  
423 condition (measured on different days) are grouped to create their respective distribution. First,  
424 cumulative frequencies for each  $D$  value were determined in ascending order, which were then  
425 plotted against corresponding  $D$  values to generate normalized cumulative distribution function  
426 (CDF) of  $D$  values using Igor Pro (Version 8; WaveMetrics, OR, USA). This CDF was fitted with the  
427 following models (Eqns A1 and A2 for one- and two-component Normal distribution models,  
428 respectively) (13).

$$\text{CDF}(D) = \frac{1}{2} \left( 1 + \text{erf} \left( \frac{D - \mu_1}{\sigma_1 \sqrt{2}} \right) \right) \quad (\text{A1})$$

$$\text{CDF}(D) = \frac{1}{2} \left[ F_1 \left( 1 + \text{erf} \left( \frac{D - \mu_1}{\sigma_1 \sqrt{2}} \right) \right) + (1 - F_1) \left( 1 + \text{erf} \left( \frac{D - \mu_2}{\sigma_2 \sqrt{2}} \right) \right) \right] \quad (\text{A2})$$

429 In the above equations,  $\mu_1$  and  $\sigma_1$  are the mean and standard deviation of the first  
430 component while  $\mu_2$  and  $\sigma_2$  are the mean and standard deviation of the second component,  $F_1$  is the  
431 fraction of first component and  $(1 - F_1)$  is the fraction of the second component of the  $D$  CDF. The  
432 best fitting model (Eqn A1 or A2) were chosen based on the absence of periodicity in the fitting  
433 residual plot and minimum reduced chi-squared value (13). A three-component model did not  
434 improve the quality of fitting in any case and therefore was not considered.

435 For two-component CDF fit, the component with smaller mean value, i.e.,  $\min [\mu_1, \mu_2] = D_{slow}$   
436 while the other component, i.e.,  $\max [\mu_1, \mu_2] = D_{fast}$ . In this case,  $F_{slow}$  corresponds to the fraction of

437 total Px units corresponding to the  $D_{\text{slow}}$  component and  $(1-F_{\text{slow}})$  is the fraction of Px units  
 438 corresponding to the  $D_{\text{fast}}$  component. For one-component CDF fit,  $D_{\text{slow}} = D_{\text{fast}}$  and  $F_{\text{slow}} = F_{\text{fast}} = 0.5$ .

439 Bootstrapping of raw  $D$  values rules out eliminates possible skewing of the  $D$  distribution due to  
 440 outlier Px units

441 We previously showed that experimental  $D$  CDFs for membrane probes are often  
 442 satisfactorily fitted with two Gaussian components with close values of  $D_{\text{slow}}$  and  $D_{\text{fast}}$  and  
 443 overlapping standard deviations (13). Therein we further demonstrated that our data statistics  
 444 ( $\sim 10,000$   $D$  values) is sufficient to distinguish 10% difference between  $D_{\text{fast}}$  and  $D_{\text{slow}}$ , i.e.,  $D_{\text{fast}}/D_{\text{slow}}$   
 445  $\geq 1.1$  can be distinguished by ImFCS. Since the large set of data came from multiple cells  
 446 measured on different days, we here decided to check whether the CDF of a randomly selected  
 447 subset of the data represents the CDF or the entire data and whether the parameters obtained from  
 448 fitting the CDFs (i.e.,  $D_{\text{fast}}$ ,  $D_{\text{slow}}$ , and  $F_{\text{slow}}$ ) are statistically reliable. For this test, we chose the  
 449 pooled  $D$  values (10,527  $D$  values) of EGFP-GG in untreated cells for which we obtained the  
 450 smallest difference between  $D_{\text{fast}}$  and  $D_{\text{slow}}$  (13). We first bootstrapped 30 times with 5% of all data  
 451 each time (i.e., Number of data points per bootstrapping ( $N_{\text{BS}} = 500$ )). The individual bootstrapped  
 452 data distributions do not show statistically significant differences among them ( $P > 0.1$ ; Mann-  
 453 Whitney test). The arithmetic average values of individual bootstrapped data sets ( $D_{\text{av}}$ ) are very  
 454 close (95% confidence interval range:  $0.638 - 0.642 \mu\text{m}^2/\text{s}$ ) (Figure A1). For comparison, the  
 455 arithmetic average of pooled data ( $D_{\text{av,pooled}}$ ) is  $0.64 \pm 0.002 \mu\text{m}^2/\text{s}$  (number of data points = 10,527)  
 456 (13) (Table S1).

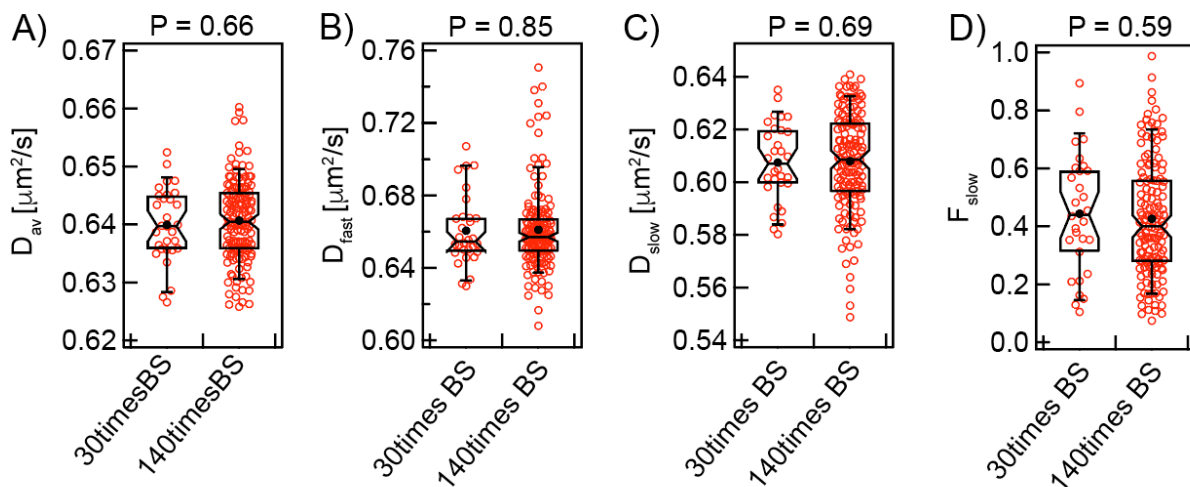

457  
 458 **Figure A1.** The range of values obtained from fitting bootstrapped CDFs does not become narrower with the number of  
 459 bootstrapping trials (30 vs 140 times). 5% of all  $D$  values ( $N_{\text{BS}} = 500$ ) of EGFP-GG was used for each bootstrapping trial.  
 460 The range of  $D_{\text{av}}$ ,  $D_{\text{fast}}$ ,  $D_{\text{slow}}$ , and  $F_{\text{slow}}$  values are shown as box plots. Box height corresponds to 25th to 75th percentile  
 461 and error bars represent 9th to 91st percentile of entire data set. Mean and median values are represented as solid circle  
 462 and bar, respectively, located inside the box. The notches signify 95% confidence interval of the median. The statistical  
 463 analysis was performed using Mann-Whitney test.

464 Bootstrapped CDFs represent same underlying distribution (one-component or two-component  
 465 Gaussian distributions) as that of CDF from entire data set

466 The CDFs of the bootstrapped data sets ( $N_{\text{BS}} = 500$ , red, Figure A2A) show little deviation  
 467 from each other, and they are distributed around the CDF of all pooled data (black, Figure A2A). As

468 expected, the spread of bootstrapped CDFs reduces as more data points are used to create these  
 469 (Figure A2A-C). These narrowly distributed CDFs allowed us to do further statistical analyses to  
 470 determine the underlying components with high precision.  
 471

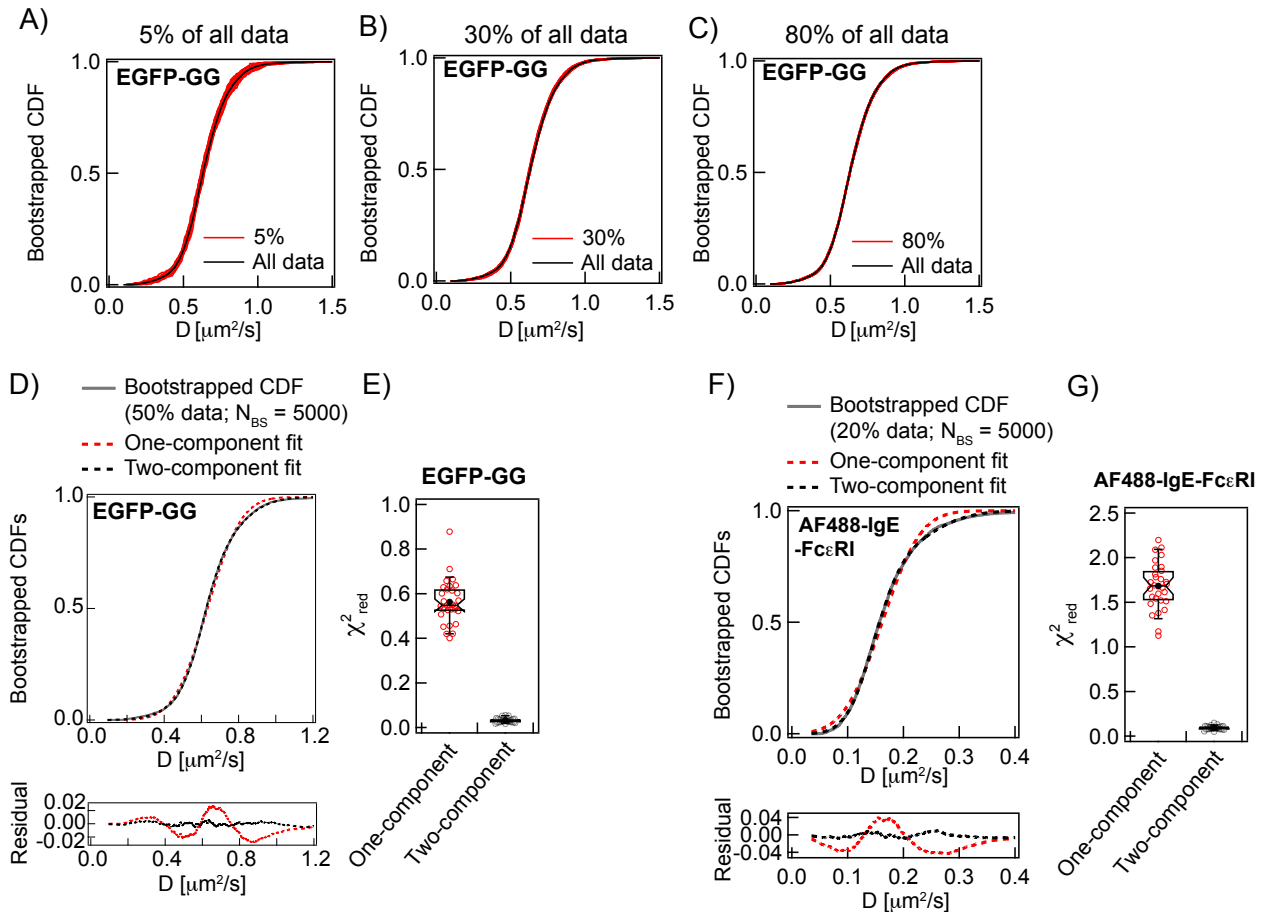

472 **Figure A2.** Two-component CDF model satisfactorily fits the bootstrapped data for EGFP-GG and AF488-IgE-FcεRI. **A-C)**  
 473 30 bootstrapped CDFs for EGFP-GG (red) with different  $N_{BS} = 500$  (5%), or = 3,000 (30%), or = 8,000 (80%) are  
 474 separately overlaid on the single CDF (black) constructed from all 10,527  $D$  values. **D)** Fitting and residual of a  
 475 representative bootstrapped CDF of EGFP-GG ( $N_{BS} = 5000$  corresponding to 50% of all data; grey solid line) with one-  
 476 component model (red dotted line) and two-component model (black dotted line). **E)** Box plots of reduced chi squared  
 477 ( $\chi^2_{red}$ ) values obtained from one-component and two-component fits of all 30 bootstrapped CDFs for EGFP-GG ( $N_{BS} =$   
 478 5000 each time). **F)** Fitting and residual of a representative bootstrapped CDF of AF488-IgE-FcεRI ( $N_{BS} = 5000$   
 479 corresponding to 20% of all data; grey solid line) with one-component model (red dotted line) and two-component model  
 480 (black dotted line). **G)** Box plots of reduced chi squared ( $\chi^2_{red}$ ) values obtained from one-component and two-component  
 481 fits of all 30 bootstrapped CDFs for AF488-IgE-FcεRI ( $N_{BS} = 5000$  each time). Box plot parameters are described in  
 482 legend to Figure A1.  
 483  
 484

485 We previously showed that the CDF obtained from entire set of EGFP-GG  $D$  values is  
 486 satisfactorily fitted with two-component Gaussian model (13). To evaluate bootstrapped CDFs we  
 487 fitted with one-component or two-component Gaussian models (Eqns A1 and A2). Figure A2D  
 488 shows a representative CDF obtained from bootstrapping of EGFR-GG  $D$  values with  $N_{BS} = 5000$   
 489 (corresponding to 50% of all data). The residuals plot clearly indicates that two-component model is  
 490 the better model. Repetition of these analyses on all 30 bootstrapped CDFs give same conclusion  
 491 which is also evident from the  $\sim 10$  time lower  $\chi^2_{red}$  values obtained for two-component fit compared

492 to one-component fit (Figure A2E). We also tested the same set of analysis on the data for AF488-  
 493 IgE-FcεRI for which we measured ~25000  $D$  values. We previously showed the CDF of all  $D$  values  
 494 is fit with a two-component model (13). As shown in Figure A2F-G, the bootstrapped CDFs also fit  
 495 better with two-component model than one-component model. Notably, we used in this case only  
 496 20% of all data for bootstrapping. In the following section, we demonstrate the optimal data  
 497 statistics required for CDF fitting with Eqns A1 and A2.

498  
 499 CDFs of bootstrapped  $D$  values with 50% of all data yield high precision of the fitted  $D_{fast}$ ,  $D_{slow}$ , and  
 500  $F_{slow}$  values

502 We fit 30 bootstrapped CDFs of EGFP-GG ( $N_{BS} = 500$  corresponding to 5% data)  
 503 individually with two-component model (Eqn A2) for component analyses and resulting range of  
 504 values for  $D_{fast}$ ,  $D_{slow}$  and  $F_{slow}$  are given in Figure A3A-C. For reference, the  $D_{fast}$ ,  $D_{slow}$  and  $F_{slow}$   
 505 values obtained after fitting the CDF of the all pooled data ( $N = 10,527$ ) are 0.66, 0.61 and 0.41  
 506 respectively (13) (Table S1). As shown in Table A1, we obtain very close average values of all three  
 507 parameters from the fitting of bootstrapped CDFs. However, while the distribution of  $D_{fast}$  and  $D_{slow}$   
 508 obtained from the fitting is narrow that of  $F_{slow}$  is more widely distributed. The range of the values  
 509 (minimum and maximum), average and standard deviation of these parameters are given in Table  
 510 A1. We observed that increasing the number of bootstrapping trials to 140 does not narrow the  
 511 range of values (Figure A4 and Table A1). Therefore, we decided to bootstrap 30 times for all our  
 512 following analyses.

513  
 514 **Table A1.** Fitting results of bootstrapped CDFs with two-component model (Eqn A2)

| Number of bootstrapping ( $N_{BS} = 500$ ) | Fitted parameters of bootstrapped CDFs  | Minimum value | Maximum value | Average | Standard deviation | 95% confidence interval range |
|--------------------------------------------|-----------------------------------------|---------------|---------------|---------|--------------------|-------------------------------|
| 30                                         | $D_{fast}$ [ $\mu\text{m}^2/\text{s}$ ] | 0.63          | 0.71          | 0.66    | 0.02               | 0.653-0.668                   |
| 140                                        |                                         | 0.61          | 0.75          | 0.66    | 0.02               | 0.658-0.665                   |
| 30                                         | $D_{slow}$ [ $\mu\text{m}^2/\text{s}$ ] | 0.58          | 0.64          | 0.61    | 0.01               | 0.602-0.613                   |
| 140                                        |                                         | 0.55          | 0.64          | 0.61    | 0.02               | 0.605-0.611                   |
| 30                                         | $F_{slow}$                              | 0.11          | 0.89          | 0.44    | 0.20               | 0.36-0.52                     |
| 140                                        |                                         | 0.07          | 0.99          | 0.43    | 0.20               | 0.39-0.46                     |

515  
 516 We next resampled the data by bootstrapping (30 times) with increasing  $N_{BS}$ , number of  $D$   
 517 values per bootstrapping trial. We bootstrapped with 5% ( $N_{BS} = 500$ ), 15% ( $N_{BS} = 1,500$ ), 30% ( $N_{BS}$   
 518 = 3,000), 50% ( $N_{BS} = 5,000$ ) and 80% ( $N_{BS} = 8,000$ ) of all EGFP-GG  $D$  values (10,527, Table S1),  
 519 and we constructed CDFs for each case. Box plots of fit parameters for these bootstrapped CDFs  
 520 using the two-component model are given in Figure A3A-C. The range of  $D_{fast}$ ,  $D_{slow}$  and  $F_{slow}$  values  
 521 becomes narrower with larger  $N_{BS}$ . However, as shown in Figure A3D-F, the Mann-Whitney test  
 522 comparing a given parameter (e.g.,  $D_{slow}$ ) between any two bootstrapped CDFs constructed from  
 523 different  $N_{BS}$  (e.g., 5% and 80% of all data) show P value > 0.05. This comparison indicates that for  
 524 most parameters the CDFs are not statistically different across this broad range of  $N_{BS}$ . The only  
 525 exception is  $F_{slow}$  obtained from the CDFs with 30% and 50% of all data.

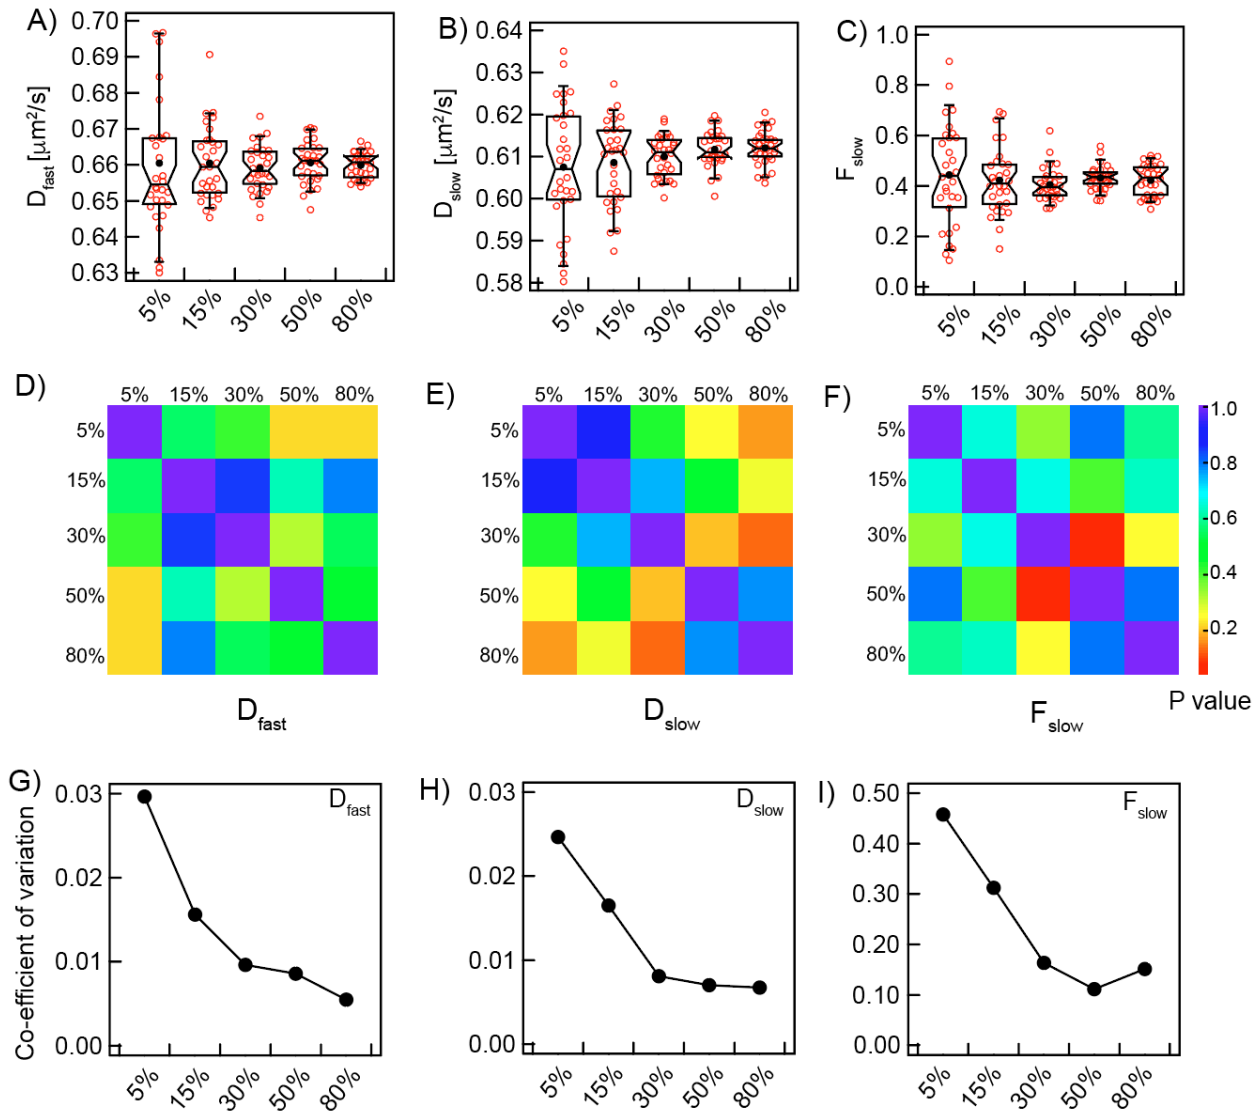

526

527 **Figure A3.** The precision of  $D_{fast}$ ,  $D_{slow}$ , and  $F_{slow}$  increases with the number of data points ( $N_{BS}$ ) used to create the  
 528 bootstrapped CDFs.  $D$  values of EGFP-GG in resting cells (- Ag) (Table S1) used in this example. 30 bootstrapped CDFs  
 529 with different  $N_{BS}$  (500 (5%), 1,500 (15%), 3,000 (30%), 5,000 (50%), and 8,000 (80%) of a total of 10,527  $D$  values) were  
 530 individually fitted with two-component model (Eqn A2). **A-C)** 30 fitted values for each parameter from CDFs obtained after  
 531 bootstrapping with increasing  $N_{BS}$ . **D-E)** P values (nonparametric Mann-Whitney test) for each pair of sets of fitted data for  
 532  $D_{fast}$ ,  $D_{slow}$ , and  $F_{slow}$  obtained from CDFs with different  $N_{BS}$ . **G-I)** Precision of  $D_{slow}$ ,  $D_{fast}$  and  $F_{slow}$ , as quantified from their  
 533 respective coefficient of variation, as a function of  $N_{BS}$ .

534 Figure A3A-C shows that as the range of  $D_{fast}$ ,  $D_{slow}$ , and  $F_{slow}$  values becomes narrower with  
 535 larger  $N_{BS}$ , estimation of these parameters becomes more precise. High precision is necessary to  
 536 compare subtle changes of a given parameter between conditions (e.g., the change of  $D_{slow}$  of  
 537 EGFP-GG before and after stimulation with Ag). We found that 5% of all data was sufficient to  
 538 achieve highly precise estimations of  $D_{fast}$  and  $D_{slow}$  as determined from their respective coefficient  
 539 of variation (CoV) plots (Figure A3G-I): CoV < 0.1 for both parameters. For  $F_{slow}$ , we needed at least  
 540 30% of all data ( $N_{BS} = 3,000$ ) to achieve CoV ~ 0.1. To be conservative, we use 50% data points in

541 ImFCS studies presented in the main text to achieve highly precise estimations of  $D_{fast}$ ,  $D_{slow}$  and  
542  $F_{slow}$  based on our data sets and analyses.

543 As a final check for bias, we performed CDF analyses on five different sets of 30  
544 bootstrapping trials using  $N_{BS} = 5000$  and the EGFP-GG data set. As illustrated in Figure A4, the  
545 five different bootstrapping sets yielded same distributions for the each of  $D_{fast}$ ,  $D_{slow}$ , and  $F_{slow}$ .

### EGFP-GG

Fitting results of 30 bootstrapped CDFs  
(50% data;  $N_{BS} = 5000$  for each bootstrapping (BS))

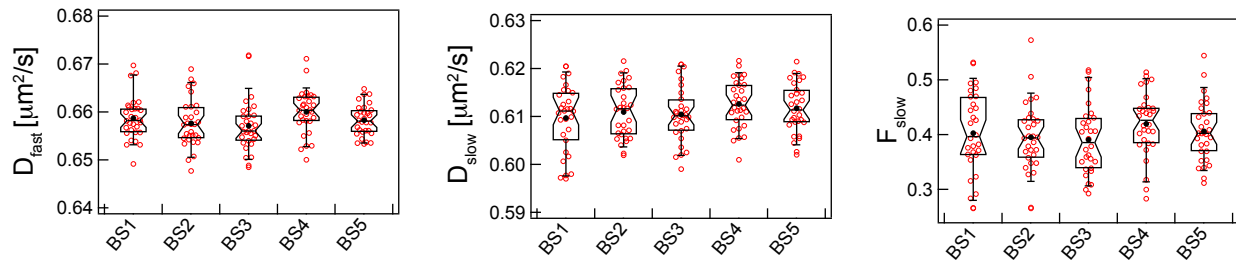

All pair-wise comparisons for each parameter:  
 $P > 0.05$  (One-way ANOVA followed by Tukey's HSD)

546  
547 **Figure A4.** Two-component fitting of multiple sets of 30 bootstrapped CDFs yield statistically indistinguishable distribution  
548 for each of  $D_{fast}$ ,  $D_{slow}$ , and  $F_{slow}$  parameters.

### 549 REFERENCES

- 550 1. D. R. Larson, J. A. Gosse, D. A. Holowka, B. A. Baird, W. W. Webb, Temporally resolved  
551 interactions between antigen-stimulated IgE receptors and Lyn kinase on living cells. *The*  
552 *Journal of cell biology* **171**, 527-536 (2005).
- 553 2. A. J. Torres, L. Vasudevan, D. Holowka, B. A. Baird, Focal adhesion proteins connect IgE  
554 receptors to the cytoskeleton as revealed by micropatterned ligand arrays. *Proceedings of the*  
555 *National Academy of Sciences of the United States of America* **105**, 17238-17244 (2008).
- 556 3. S. T. Hess, E. D. Sheets, A. Wagenknecht-Wiesner, A. A. Heikal, Quantitative analysis of the  
557 fluorescence properties of intrinsically fluorescent proteins in living cells. *Biophysical journal*  
558 **85**, 2566-2580 (2003).
- 559 4. P. S. Pyenta, D. Holowka, B. Baird, Cross-correlation analysis of inner-leaflet-anchored green  
560 fluorescent protein co-redistributed with IgE receptors and outer leaflet lipid raft components.  
561 *Biophysical journal* **80**, 2120-2132 (2001).
- 562 5. W. Rodgers, Making Membranes Green: Construction and Characterization of GFP Fusion  
563 Proteins Targeted to Discrete Plasma Membrane Domains. *BioTechniques* **32**, 1044-1051  
564 (2002).
- 565 6. P. Sengupta, A. Hammond, D. Holowka, B. Baird, Structural determinants for partitioning of  
566 lipids and proteins between coexisting fluid phases in giant plasma membrane vesicles.  
567 *Biochimica et biophysica acta* **1778**, 20-32 (2008).
- 568 7. S. Hammond, A. Wagenknecht-Wiesner, S. L. Veatch, D. Holowka, B. Baird, Roles for SH2  
569 and SH3 domains in Lyn kinase association with activated Fc $\epsilon$ RI in RBL mast cells revealed  
570 by patterned surface analysis. *Journal of structural biology* **168**, 161-167 (2009).
- 571 8. M. Kovarova *et al.*, Structure-function analysis of Lyn kinase association with lipid rafts and  
572 initiation of early signaling events after Fc $\epsilon$ RI aggregation. *Molecular and*  
573 *cellular biology* **21**, 8318-8328 (2001).

- 574 9. B. M. Vonakis, H. Haleem-Smith, P. Benjamin, H. Metzger, Interaction between the  
575 unphosphorylated receptor with high affinity for IgE and Lyn kinase. *J Biol Chem* **276**, 1041-  
576 1050 (2001).
- 577 10. R. M. Young, X. Zheng, D. Holowka, B. Baird, Reconstitution of regulated phosphorylation of  
578 FcepsilonRI by a lipid raft-excluded protein-tyrosine phosphatase. *J Biol Chem* **280**, 1230-  
579 1235 (2005).
- 580 11. J. Schindelin *et al.*, Fiji: an open-source platform for biological-image analysis. *Nature*  
581 *methods* **9**, 676-682 (2012).
- 582 12. A. Halayaty *et al.* (2008) Mathematical model and software FRAPAnalyser for analysis of  
583 actin-cytoskeleton dynamics with FRAP experiments. in *Proceedings of FEBS/ECF Workshop*  
584 *Mechanics and Dynamics of the Cytoskeleton* (Postdam).
- 585 13. N. Bag, D. A. Holowka, B. A. Baird, Imaging FCS delineates subtle heterogeneity in plasma  
586 membranes of resting mast cells. *Molecular biology of the cell* **31**, 709-723 (2020).
- 587 14. J. Sankaran, N. Bag, R. S. Kraut, T. Wohland, Accuracy and precision in camera-based  
588 fluorescence correlation spectroscopy measurements. *Analytical chemistry* **85**, 3948-3954  
589 (2013).
- 590 15. N. Bag, J. Sankaran, A. Paul, R. S. Kraut, T. Wohland, Calibration and limits of camera-based  
591 fluorescence correlation spectroscopy: a supported lipid bilayer study. *Chemphyschem : a*  
592 *European journal of chemical physics and physical chemistry* **13**, 2784-2794 (2012).

593

594
